# Supplementary material
Source: Springer Nature journal article supplement (https://www.springermedizin.de/resource/supplementary/12955_2005_207_MOESM2_ESM.pdf/9559900)

# Age groups (years)

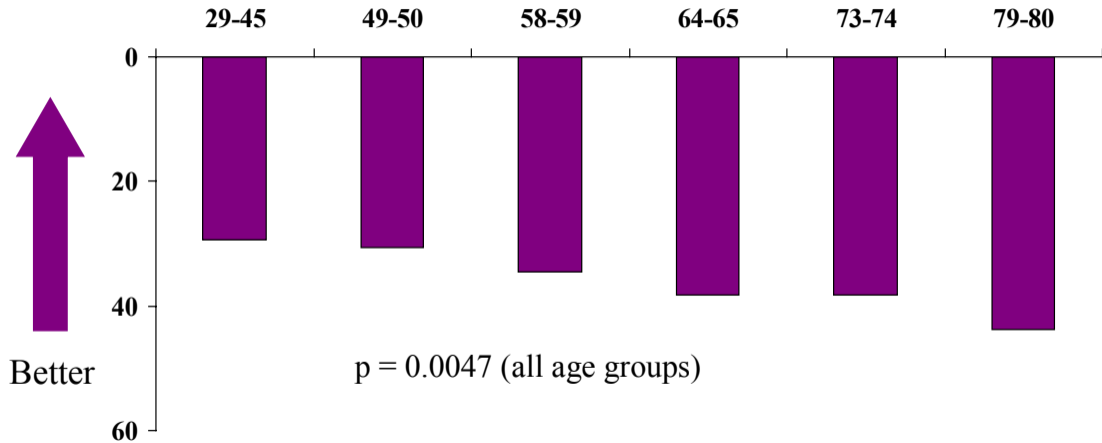

Supplement: MOESM2 [file 9559900]
